# Supplementary material
Source: PubMed Central journal article supplement (PMC7233464)
Supplement: NIHMS1587037-supplement-supplemental_info.pdf [file NIHMS1587037-supplement-supplemental_info.pdf]

## SUPPLEMENTAL DATA

### **Hydrolyzed Ce(IV) Salts Limit Sucrose-Dependent Biofilm Formation by *Streptococcus mutans***

Lopa Bhatt<sup>1</sup>, Lin Chen,<sup>2</sup> Jinglong Guo<sup>1</sup>, Robert F. Klie<sup>1</sup>, Junhe Shi,<sup>2</sup> Russell P. Pesavento<sup>3\*</sup>

<sup>1,2,3</sup> University of Illinois at Chicago, 801 S. Paulina Street, Chicago, IL, 60612, USA

<sup>1</sup> Department of Physics

<sup>2</sup> Center for Wound Healing and Tissue Regeneration, College of Dentistry

<sup>3</sup> Department of Oral Biology, College of Dentistry

<sup>3</sup> The Center for Biomolecular Sciences and Department of Medicinal Chemistry and Pharmacognosy

\*To whom correspondence should be addressed

rpesaven@uic.edu

## Contents

|                                  |      |
|----------------------------------|------|
| 1. <b>Figure S1</b> .....        | S3   |
| 2. <b>Table S1</b> .....         | S4   |
| 3. <b>Figures S2 (A-E)</b> ..... | S5-6 |
| 4. <b>Figure S3 (A-B)</b> .....  | S7   |
| 5. <b>Figure S4</b> .....        | S8   |
| 6. <b>Figure S5</b> .....        | S9   |

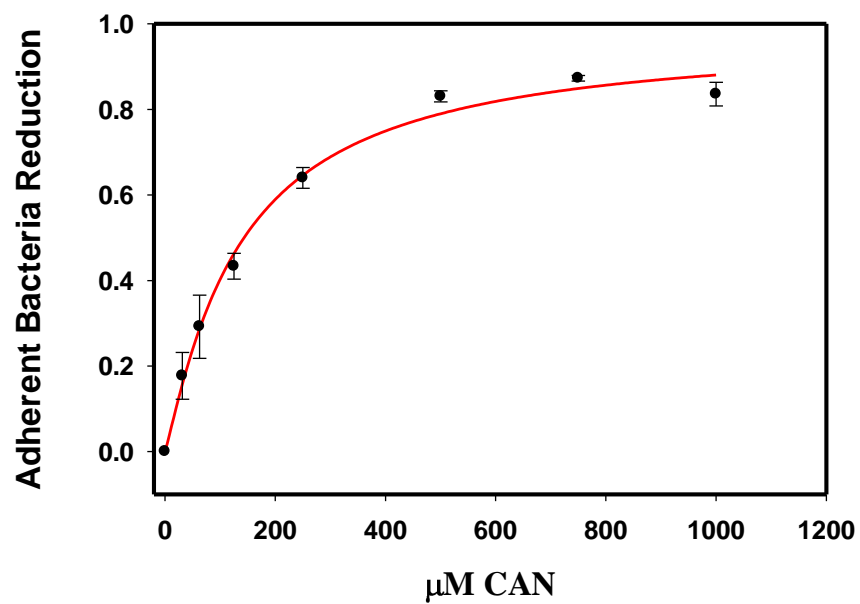

**Figure S1.** A dose response curve quantifying adherent bacteria reduction upon treatment of *S. mutans* UA159 with increasing concentrations of hydrolyzed CAN in BHI at 37°C, 5% CO<sub>2</sub> (20 h growth). An adherent bacteria reduction of 0.5 is designated as the IC<sub>50</sub> (137 ± 24 μM CAN).

**Table S1.** Sucrose Metabolism Assay (Acid Production) in Phenol Red Broth Base (37°C, 5% CO<sub>2</sub>)

| Time                                 | (+) control | (-) control | 250 µM CAN | 250 µM CAS  |
|--------------------------------------|-------------|-------------|------------|-------------|
| 0 h                                  | 7.41 ± 0.01 | 7.33 ± 0.01 | 7.18       | 7.20        |
| 5 h                                  | 5.65 ± 0.03 | 6.92        | 5.67       | 5.63 ± 0.01 |
| 20 h                                 | 5.24 ± 0.04 | 6.72 ± 0.01 | 5.33       | 5.31 ± 0.01 |
| % difference in pH of media 0 - 20 h | % 29.3      | % 8.4       | % 25.8     | % 26.2      |

(+) control = Phenol Red Broth Base, cells, 1% sucrose,

(-) control = Phenol Red Broth Base, 1% sucrose and 250 µM CAN

% difference pH over 20 h = [(media pH at time 0 – media pH at 20 h)]/[(media pH at time 0)] (x 100)

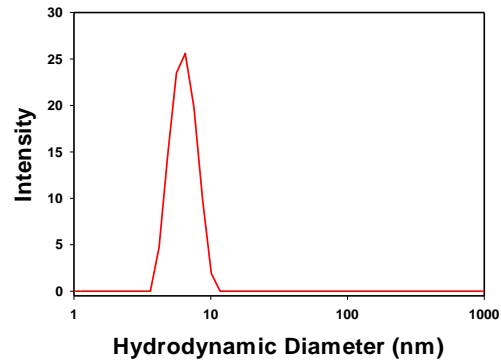

**Figure S2-A.** DLS size data of 5 mM CAN (30 mM NO<sub>3</sub><sup>-</sup>) in Milli-Q water.

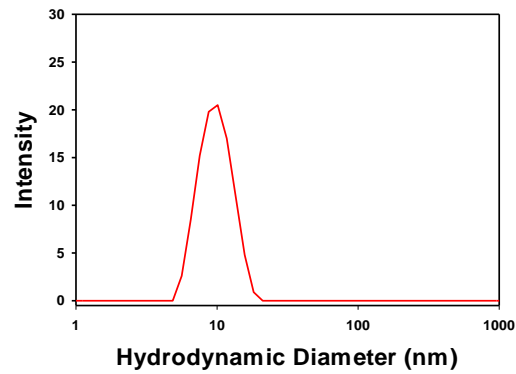

**Figure S2-B.** DLS size data of 5 mM Ce(IV) Nitrate (30 mM NO<sub>3</sub><sup>-</sup>) in Milli-Q water.

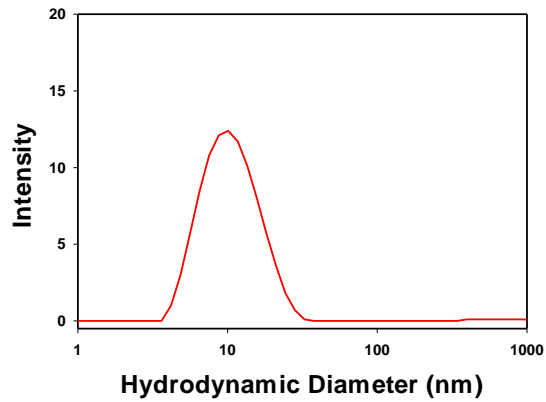

**Figure S2-C.** DLS size data of 5 mM Strem, 3nm CeO<sub>2</sub>-NP (30 mM NO<sub>3</sub><sup>-</sup>) in Milli-Q water.

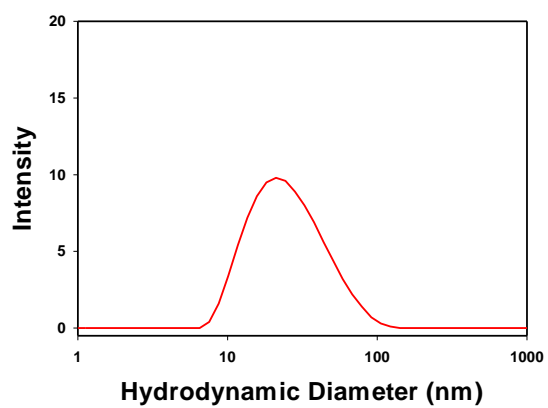

**Figure S2-D.** DLS size data of 5 mM Alfa Aesar, 10-20 nm CeO<sub>2</sub>-NP (30 mM NO<sub>3</sub><sup>-</sup>) in Milli-Q water.

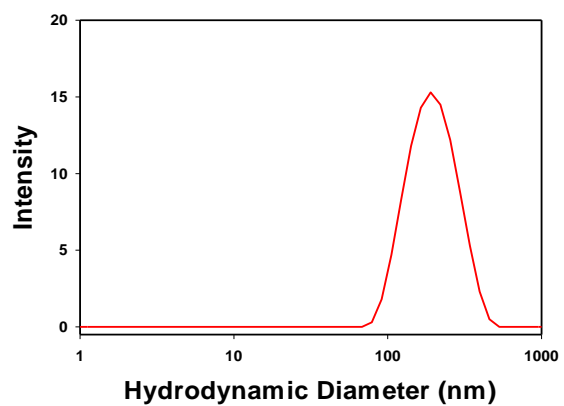

**Figure S2-E.** DLS size data of 5 mM Alfa Aesar, 30 nm CeO<sub>2</sub>-NP (30 mM NO<sub>3</sub><sup>-</sup>) in Milli-Q water.

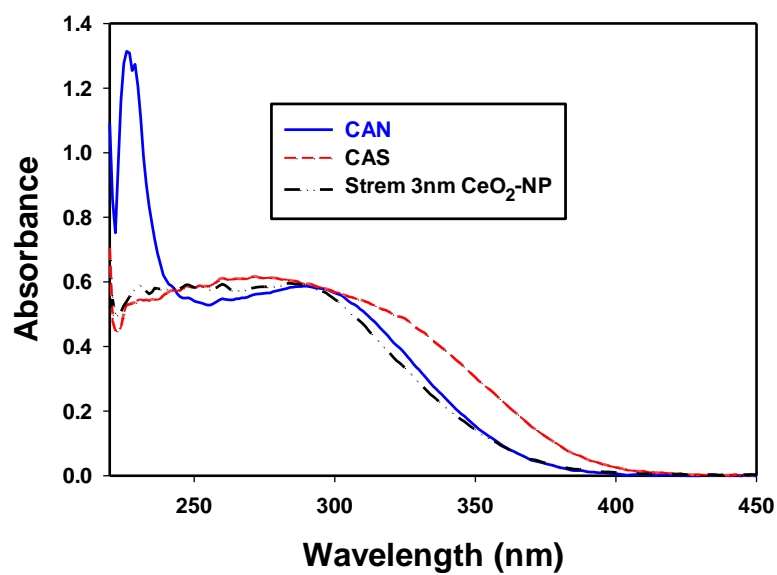

**Figure S3.** UV-Vis absorption spectra of 150  $\mu\text{M}$  (Ce) CAN, CAS and Strem 3 nm  $\text{CeO}_2$ -NP in  $\text{H}_2\text{O}$  at rt. The solutions were allowed to stand 6 h following hydrolysis/dilution. The intense peak at 230 nm in the spectrum of CAN is attributed to the  $\text{NO}_3^-$  absorbance.

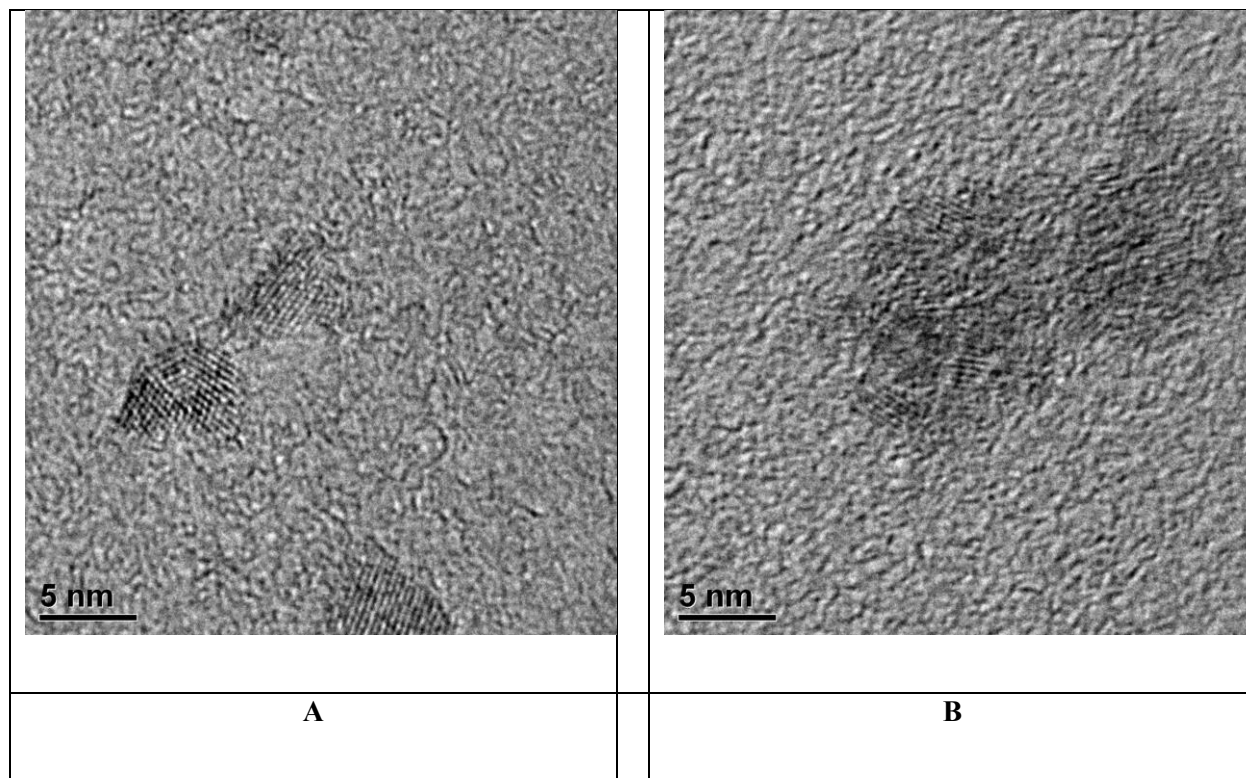

**Figure S4 A.** HR-TEM image CeO<sub>2</sub>-NP derived from CAN hydrolysis (aged 20 h in Milli-Q water) **B.** HR-TEM image CeO<sub>2</sub>-NP derived from CAS hydrolysis (aged 20 h in Milli-Q water)



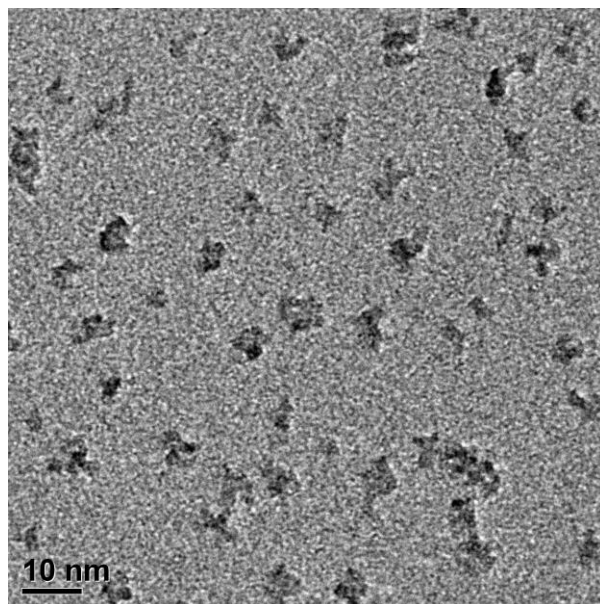

**Figure S5.** HR-TEM image CeO<sub>2</sub>-NP derived from CAN hydrolysis (aged 20 h in Milli-Q water)
